1 Mutation, selection, and quantitative genetic architecture of susceptibility to bacterial pathogens  
2 in *C. elegans*

3

4 Lindsay M. Johnson<sup>1,2,\*</sup>, Sayran Saber<sup>1,\*</sup>, Md. Monjurul Islam Rifat<sup>1</sup>, Sydney Rouse<sup>1</sup>, and  
5 Charles F. Baer<sup>1,3,†</sup>

6

7 1 – Dept. of Biology, University of Florida, Gainesville, FL 32611 USA

8 2 – Present address: Resilience Biotechnologies, Inc., Alachua, FL, 32615 USA

9 3 - University of Florida Genetics Institute, Gainesville, FL 32611 USA

10 \* - These authors contributed equally

11 † - Communication to: cbaer@ufl.edu

12

13

14 **Abstract**

15 Understanding the evolutionary and genetic underpinnings of susceptibility to pathogens is of  
16 fundamental importance across a wide swathe of biology. Much theoretical and empirical effort  
17 has focused on genetic variants of large effect, but pathogen susceptibility often appears to be a  
18 polygenic complex trait. Here we investigate the quantitative genetics of survival over 120  
19 hours of exposure ("susceptibility") of *C. elegans* to three bacterial pathogens of varying  
20 virulence, along with the non-pathogenic OP50 strain of *E. coli*. We compare the genetic  
21 (co)variance input by spontaneous mutations accumulated under minimal selection to the  
22 standing genetic (co)variance in a set of ~50 wild isolates. Three conclusions emerge. First,  
23 with one exception, mutations increase susceptibility to pathogens, and susceptibility is  
24 uncorrelated with fitness in the absence of pathogens. Second, the orientation in trait space of  
25 the heritable (co)variance of wild isolates is sufficiently explained by mutation. However,  
26 pathogen susceptibility is clearly under purifying, apparently directional, selection of magnitude  
27 similar to that of competitive fitness in the MA conditions. The results provide no evidence for  
28 fitness tradeoffs between pathogen susceptibility and fitness in the absence of pathogens, nor  
29 that balancing selection is important in maintaining genetic variation for susceptibility to these  
30 bacterial pathogens.

31

## 32 Introduction

33 Infection by pathogens is historically the leading cause of human mortality, and pathogens  
34 continue to exact an enormous societal toll. Moreover, the relationship between pathogens and  
35 their hosts holds an exalted place in evolutionary biology [1, 2]. It is well-established that  
36 susceptibility of individuals to the harmful effects of pathogens often has a genetic basis. In  
37 some cases, the genetic basis of variation in host susceptibility to pathogens can be attributed  
38 to variants at one or two loci. For example, variants at a few loci in the human genome (e.g.,  
39 *HBB*, *ABO*, *G6PD*) are famously implicated in resistance to malaria [3]. The notion that  
40 *particular* (multilocus) host genotypes confer resistance or susceptibility to *particular* pathogen  
41 genotypes has had outsize influence in evolutionary biology, because "Red Queen" models of  
42 the evolution of sex and recombination are predicated on fluctuating epistasis [4], with negative  
43 frequency-dependent selection resulting from a host-pathogen arms-race providing the most  
44 obvious plausible scenario [2].

45 Often, however, the heritable basis of susceptibility to a particular pathogen appears to  
46 be polygenic, with a substantial fraction of unexplained heritability [5-8], sometimes even in  
47 cases with segregating large-effect loci (e.g., malaria [9]). Pathogens may thus impose  
48 significant selection even in the absence of Red Queen dynamics. It seems reasonable, then,  
49 to consider "susceptibility to pathogen X" as a generic complex trait; in some cases, there will  
50 be loci of large effect that explain much of the variance in susceptibility, but other times there  
51 will not.

52 Two fundamental issues in understanding the biology of complex traits, are (i) what is  
53 the rate of input of genetic variance (and covariance) by mutation? and (ii) what is the  
54 relationship of the trait(s) with fitness? Taken together, these two considerations present a  
55 hierarchy of evolutionary hypotheses. The simplest explanation for any pattern of (co)variation  
56 is neutral evolution *sensu stricto*, i.e., the pattern can be sufficiently explained by neutral  
57 mutation and random genetic drift. If the pattern cannot be plausibly explained by neutral

58 evolution, the next-simplest explanation is purifying selection against unconditionally deleterious  
59 mutations, plus drift. Only if those two explanations prove unsatisfactory need more  
60 complicated explanations be considered; for example, scenarios of balancing or positive  
61 selection.

62 It is a bedrock principle of neutral theory that polymorphism within a group is expected to  
63 be proportional to divergence between groups if the only evolutionary forces involved are  
64 mutation, drift, and uniform purifying selection [10-12]. For DNA sequences, the proportionality  
65 is between nucleotide diversity ( $\theta \approx 4N_e\mu$  in diploids) and divergence between taxa ( $D=2\mu t$ ),  
66 where  $N_e$  is the genetic effective population size,  $\mu$  is the per-nucleotide mutation rate and  $t$  is  
67 the time since divergence, in generations. From classical population genetics theory, the  
68 frequency of a deleterious allele at mutation-selection balance (MSB) is  $\hat{q} \approx \frac{\mu}{s}$ , where  $s$  is the  
69 strength of purifying selection [13] (in the case of near-complete selfing, as in *C. elegans*, the  
70 relevant selection coefficient is the homozygous effect). The strength of purifying selection  
71 and/or the mutation rate may differ between genes, but the proportionality is not affected.

72 For quantitative traits, the analog of the per-nucleotide mutation rate,  $\mu$ , is the mutational  
73 variance  $V_M=U\alpha^2$ , where  $U = \sum_i \mu_i$  is the genomic mutation rate and  $\alpha^2$  is the average squared  
74 effect of a new mutation on the trait [11, 14, 15]. Different traits represent the quantitative  
75 genetic analog to different genes at the molecular level. For a neutral trait at mutation-drift  
76 equilibrium, the genetic variation segregating within a population  $V_G=2N_eV_M$ , and populations will  
77 diverge asymptotically at rate  $2V_M$  [11]. For traits under purifying selection (directional or  
78 stabilizing), at MSB  $V_G \approx \frac{V_M}{s}$ , where  $s$  is the average strength of purifying selection against a  
79 mutant allele that affects the trait [15-17].

80 Obviously, no trait is an island [18], which is to say that the evolutionary fate of an allele  
81  $x$  that affects trait  $Z$  depends not only on its effect on  $Z$  (plus drift) but also on its pleiotropic  
82 effects on all other selected traits, and also on the cumulative effects of alleles with which  $x$  is in

83 linkage disequilibrium. The relationship  $V_G \approx \frac{V_M}{s}$  implicitly includes both the direct selective  
84 effects of mutations on the trait in question, but also the pleiotropic effects of selection on  
85 correlated traits.

86 The multivariate extensions of  $V_G$  and  $V_M$  are the standing genetic and mutational  
87 variance-covariance matrices,  $\mathbf{G}$  and  $\mathbf{M}$ , of which the diagonal elements are the variances,  $V_{G,i}$   
88 and  $V_{M,i}$  respectively, and the off-diagonal elements are the genetic/mutational covariance  
89 between traits  $i$  and  $j$ ,  $Cov_{G,ij}$  and  $Cov_{M,ij}$  [19]. The covariances capture the cumulative effects of  
90 pleiotropy and linkage disequilibrium.

91 In a finite population, random genetic drift removes genetic (co)variance at rate  $(1 - \frac{1}{2N_e})$   
92 per generation. Thus, for neutral traits at mutation-drift equilibrium, the expectation is  $\mathbf{G}=2N_e\mathbf{M}$   
93 with random mating and  $4N_e\mathbf{M}$  with complete selfing [11]. For traits under strong (quasi-  
94 deterministic) selection, the evolution of  $\mathbf{G}$  can be (approximately) captured in the relationship  
95  $\Delta\mathbf{G} = \mathbf{G}(\boldsymbol{\gamma} - \boldsymbol{\beta}\boldsymbol{\beta}^T)\mathbf{G} + 2\mathbf{M} - 2\sum_{i=1}^n\sum_{j=1}^nr_{ij}(C_{ij} - C'_{ij})$  [19, 20]. The first term in parentheses  
96 describes the composite effects of selection, both directional ( $\boldsymbol{\beta}$ ) and quadratic (the matrix of  
97 stabilizing and correlational selection gradients,  $\boldsymbol{\gamma}$ ), and the second term in parentheses  
98 describes the decay by recombination of genetic covariance resulting from linkage  
99 disequilibrium built up by selection and mutation, where  $r_{ij}$  is the recombination rate between  
100 loci  $i$  and  $j$  (the effects of LD are usually sufficiently weak to where they can be ignored [20]). At  
101 MSB,  $\Delta\mathbf{G}=0$ , so the deviation between  $\mathbf{G}$  and  $\mathbf{M}$  represents the cumulative effects of selection  
102 (**Figure 1**). Unfortunately, there is no stochastic theory of the evolution of  $\mathbf{G}$  equivalent to that  
103 for discrete loci [21, 22], so the hypothesis of neutral evolution as an underlying cause of an  
104 observed deviation between  $\mathbf{G}$ -matrices (e.g., different populations or species), or between  $\mathbf{G}$   
105 and  $\mathbf{M}$ , cannot be formally tested [23]. However, a significant difference between  $\mathbf{G}$  and  $\mathbf{M}$  is  
106 sufficient to reject the hypothesis that mutation alone is a sufficient predictor of  $\mathbf{G}$ ; at minimum,

107 genetic drift has caused **G** to evolve a different genetic architecture than expected from  
108 mutation in the absence of other evolutionary forces.

109 Here we report results of a set of experiments in which we (i) estimate the cumulative  
110 effects of spontaneous mutations on the susceptibility of two strains of *C. elegans* to three  
111 bacterial pathogens, and (ii) estimate the standing genetic (co)variance for susceptibility to  
112 those same three pathogens from a set of ~50 *C. elegans* wild isolates. Our first, broad goal is  
113 to determine the realms of consistency and of idiosyncrasy in the mutational process in the  
114 context of host-pathogen evolution. Our second, broad goal is to draw inferences about the  
115 strength and pattern of natural selection acting on *C. elegans*' susceptibility to bacterial  
116 pathogens, relative to the inferred strength of selection on competitive fitness.

117

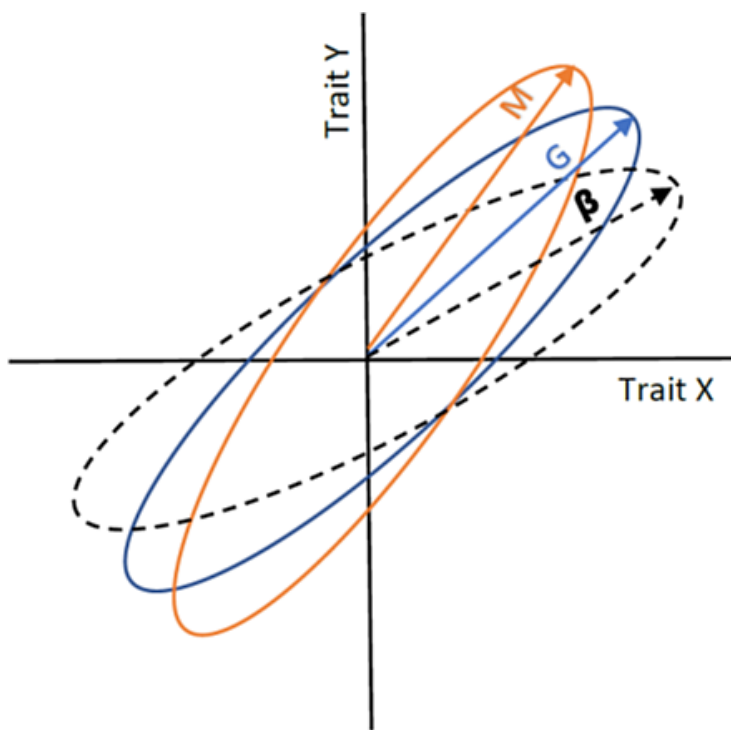

118

119 **Figure 1.** Depiction of a hypothetical relationship between two traits, X and Y. The orange  
120 ellipse represents the input of genetic (co)variance by mutation (**M**), the black dashed ellipse

121 represents the trajectory of bivariate directional selection ( $\beta$ ), and the blue ellipse represents the  
122 genetic (co)variance matrix ( $\mathbf{G}$ ) at mutation-selection balance. After [20].

123

## 124 **Materials and Methods**

### 125 *Mutation Accumulation (MA) experiments – basic principles*

126 A mutation accumulation experiment is simply a pedigree, in which replicate populations derived  
127 from a known, (ideally) genetically-homogeneous progenitor are propagated under conditions in  
128 which natural selection is minimally effective [24, 25]. Typically, selection is minimized by  
129 minimizing  $N_e$ ; mutations with fitness effects  $s < 1/4N_e$  are effectively neutral [26].

130 MA experiments can be used to illuminate the workings of natural selection in two ways.  
131 First, they provide the most straightforward and least assumption-laden way to estimate  
132 mutational (co)variances, which can be compared to the standing genetic (co)variances as  
133 outlined in the Introduction. Second, if selection is directional, or at least has a directional  
134 component, mutational bias (i.e.,  $\Delta M \neq 0$ ) will generally point in the opposite direction of  
135 selection. On average, mutations are deleterious. Thus, fitness declines under MA conditions.  
136 Traits that are positively correlated with fitness should, on average, exhibit a negative mutational  
137 bias; traits that are negatively correlated with fitness should, on average, exhibit a positive  
138 mutational bias. By way of comparison, the same principle underlies inbreeding depression,  
139 wherein rare recessive alleles produce a deleterious phenotype when homozygous.

140

### 141 *Mutation Accumulation (MA) lines*

142 Details of the mutation accumulation experiment are given in [27]. N2 is the standard laboratory  
143 strain of *C. elegans*; PB306 is a wild isolate graciously provided by Scott Baird. The basic  
144 protocol follows that of Vassilieva and Lynch [28] and is outlined in **Figure 2**. Briefly, replicate  
145 populations (MA lines) were initiated from a cryopreserved stock of a highly-inbred ancestor at

146 mutation-drift equilibrium and propagated by transferring a single immature hermaphrodite at  
147 each generation (four-day intervals). Worms were maintained on 60mm NGM agar plates,  
148 spotted with 100  $\mu$ l of an overnight culture of the OP50 strain of *E. coli* B, at a constant 20°C.  
149 The lines were propagated for 250 transfers ( $G_{250}$ ), beginning in March, 2001 and culminating  
150 with a final cryopreservation in 2005.  
151

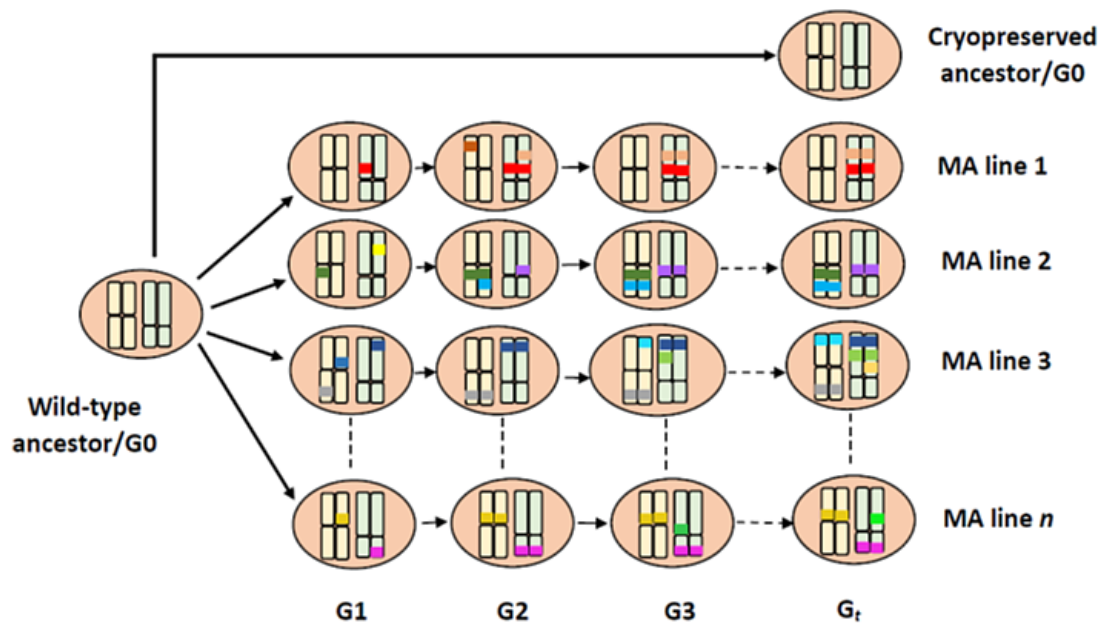

152  
153 **Figure 2.** Schematic depiction of the MA experiment. Ovals represent individuals, with two  
154 pairs of chromosomes (yellow, green). Colored bars on chromosomes represent mutations  
155 unique to each MA line, which accumulate over the course of the  $t$  ( $\approx 250$ ) generations of MA;  
156 the ancestor is taken to be genetically uniform and homozygous at all loci. At each generation  
157 ( $G_1, G_2, \dots, G_t$ ), a single individual is propagated to a new plate to found the next generation.

158 At every transfer, the prior two generations of each MA line were kept at 20°C as  
159 backups; if the focal worm did not reproduce, the plate was reinitiated with an immature  
160 individual from the previous generation; we refer to this as "going to backup". If the focal worm  
161 reproduced but no offspring had reached the L2 stage, we kept the offspring in the experiment



162 to reproduce in the next generation; we refer to this delay in reproduction as "holding over".  
163 Holding over reduces the actual number of generations of evolution of an MA line below the  
164 maximum ( $G_{250}$ ). In principle, going to backup should have no effect on the total number of  
165 generations of MA, because the backup worm should be a (double) first cousin of the worm that  
166 would have been transferred. However, there is some opportunity for overlapping generations  
167 on backup plates (e.g., if we had to go to backup twice or more in a row), so there is some  
168 ambiguity with respect to the actual number of generations of MA. The upper bound on the  
169 number of generations is the total number of possible transfers in the experiment ( $G_{250}$ ); the  
170 lower bound is the number of successful transfers ( $G_{\text{MIN}}$ ). Data on transfers and additional  
171 context is given in **Supplemental Table S1**.

172         Of the 100 N2 and PB306 MA lines initiated in 2001, 73 N2 MA lines and 71 PB306  
173 remained available at the time these experiments were initiated in 2015. Of those lines, whole  
174 genome sequencing subsequently revealed that four pairs of the N2 lines and six pairs of the  
175 PB306 lines were cross-contaminated at some point in the MA process. Accordingly, we  
176 discarded one line from each pair, retaining the line for which the total sample size was larger.  
177 On average, each MA line carries about 65 spontaneous base-substitution and small indel  
178 mutations [29], with probably a few larger structural variants (Saxena and Baer, unpublished  
179 results).

180         The cryopreserved progenitor ( $G_0$ ) serves as a control in two ways. The difference  
181 between the trait mean of the  $G_0$  and MA treatments represents the cumulative effect of  
182 spontaneous mutations on the trait mean. If the  $G_0$  progenitor is subdivided into replicate  
183 "pseudolines" (PS) which are subsequently treated identically to the MA lines (**Figure 2**), the  
184 difference between the among-MA line and the among-PS line components of variance  
185 represents the cumulative heritable variance resulting from the accumulation of spontaneous  
186 mutations (and potentially epimutations, depending on the experimental design [30, 31]). PS  
187 lines were constructed by thawing a sample of the cryopreserved  $G_0$  progenitor onto an agar

188 plate. The next day, individual L4 stage hermaphrodites were picked singly to new plates, each  
189 of which was designated a PS line. PS lines were subsequently treated as if they were MA lines.  
190 Unfortunately, due to a management error on the part of the senior author (CFB), not all  
191 pathogen treatments include similar numbers of pseudolines (see below).

192

### 193 *Competitive fitness assay*

194 Competitive fitness of the PB306 MA lines and their G0 progenitor was assayed in two blocks,  
195 beginning in May, 2005. The details of that assay have been published elsewhere [32], and are  
196 reprinted in the **Supplemental Material**. Fitness assay data are given in **Supplemental Table**  
197 **S2**.

198

### 199 *Wild isolates*

200 A collection of wild isolates of *C. elegans* was obtained from Erik Andersen (Northwestern  
201 University) in 2015 and cryopreserved in the Baer lab. A list of the wild isolates is given in  
202 **Supplemental Table S3**. The genome sequences of the wild isolates along with collection  
203 information are available at <https://www.elegansvariation.org/>.

204

### 205 *Pathogen infection and survival assay*

206 We used four strains of bacteria; three documented pathogens (the PA14 strain of  
207 *Pseudomonas aeruginosa*, the NCTC8325 strain of *Staphylococcus aureus*, the OG1RF strain  
208 of *Enterococcus faecalis*) and the standard laboratory worm food, the OP50 strain of *E. coli*.  
209 We use the term "pathogen" to refer to the three pathogenic species, and "bacteria" when OP50  
210 is included. Each bacterial species was assayed in three or four experimental blocks.  
211 Pathogens were acquired from Erik Andersen and kept frozen at -80°C until use. The basic  
212 protocol is a variant of the Andersen lab "slow killing assay" [33] (**Supplemental Figure S1**), the  
213 variation being that the bacterial lawn was spread on the plates rather than spotted. Spreading

214 the lawn makes it less likely that worms can mitigate the harmful effects of the pathogen simply  
215 by avoiding it (although variation in behavior is obviously meaningful in its own right).

216 Preparation of slow-killing assay (SKA) plates - On day 5 of the assay, the bacterial species to  
217 be used in that block was thawed and spread onto LB plates and incubated at 37°C for two  
218 days. On day 7, a single bacterial colony was picked to inoculate ~28 ml of YT media, which  
219 was incubated in a shaking incubator at 100 RPM at 37°C for 24 hrs. After 24 hours (day 8), 5µl  
220 of bacterial culture was spread onto a 35 mm NGMA SKA plate containing 0.05% of 100mg/mL  
221 filter-sterilized fluorodeoxyuridine (FUDR) which prevents worm progeny from hatching by  
222 inhibiting DNA synthesis [34]. Assay plates were incubated in a closed plastic container at 37°C  
223 for 24 hours. On day 9, SKA plates were moved to a 25°C incubator.

224 Assay protocol - On day 1 of an assay block the MA lines and G0 ancestor were thawed onto  
225 60mm agar plates (P0) seeded with OP50 and stored at 20°C. After 24 hours (day 2) a single  
226 L4 hermaphrodite (P1) was picked onto a new 60mm agar plate seeded with OP50 and  
227 incubated at the ultimate assay temperature of 25°C. Each MA line was replicated three-fold;  
228 the number of replicates from PS lines varied by block (**Supplemental Table S4**). On day 6, a  
229 single L4 hermaphrodite (F1) from each replicate was picked to a new plate and incubated at  
230 25°C. On day 10, 30±3 L4 (sometimes L3) stage worms (F2) from each line were picked onto  
231 the SKA plates. Assay plates were assigned random numbers and subsequent handling was in  
232 random order. The number of living progeny on each plate was counted at 12 hour intervals for  
233 120 hours.

234 Survival was determined via blue light exposure. Worms exhibit a phototactic response  
235 when exposed to blue light [35]. Non-motile worms were illuminated with a blue laser pointer for  
236 five seconds; worms that did not move after this time were categorized as dead. It is important  
237 to note that only worms that were observed moving were counted as alive, those that may have  
238 crawled off the plate, or buried themselves into the agar were not counted as alive.

239

240 *Data Analysis*

241 (i) Survival probability. Survival over the course of the assay was quantified by means of the  
242 chain binomial parameter,  $\hat{p}$  [36]. For a single interval, the probability of survival from time  $t$  to  
243 time  $t+1$  can be expressed as

$$244 \quad P(N_{t+1} = n_{t+1} | N_t = n_t) = \binom{n_t}{n_{t+1}} p^{n_{t+1}} (1-p)^{n_t - n_{t+1}}, \quad \text{Equn. 1}$$

245 where  $n_t$  and  $n_{t+1}$  denote the number of individuals alive at times  $t$  and  $t+1$ , respectively. The  
246 likelihood of survival over the entire course of the experiment (120 hrs at 12 hr intervals) is given  
247 by the equation

$$248 \quad \mathcal{L}(p) = \prod_{i=1}^T \binom{n_{i-1}}{n_i} p^{n_i} (1-p)^{n_{i-1} - n_i}, \quad \text{Equn. 2}$$

249 where  $T$  denotes the number of time steps.  $\hat{p}$  is the value of  $p$  that maximizes the likelihood in  
250 equation 2, calculated by taking the natural logarithm of equation 2, differentiating with respect  
251 to  $p$ , and equating to zero.

252 We previously quantified survivorship over the course of a pathogen exposure assay  
253 with the statistic LT50 [33], but  $\hat{p}$  is a more meaningful measure of survival than LT50 when a  
254 large fraction of individuals survive the assay, as is the case here for all bacteria except *PA14*  
255 **(Supplemental Figure S2).**

256 (ii) Mutational parameters. Three statistics were calculated to quantify the cumulative effects of  
257 mutation accumulation on pathogen susceptibility. First, we estimated the mutational bias ( $\Delta M$ ),  
258 the per-generation change in the trait mean due to mutation accumulation.  $\Delta M$  is calculated as:

$$259 \quad \Delta M = \frac{\bar{z}_{MA} - \bar{z}_0}{\bar{z}_0 t}, \quad \text{where } \bar{z}_{MA} \text{ is the mean of the MA lines, } \bar{z}_0 \text{ is the mean of the G0 progenitor, and } t$$

260 is the number of generations of MA ( $t=250$ ) [37].

261 Second, we measured the mutational variance,  $V_M$ , which calculates the change in  
262 among line variance in the MA lines compared to the PS lines.  $V_M$  is calculated as:

263  $V_M = \frac{V_{L,MA} - V_{L,0}}{2t}$ , where  $V_{L,MA}$  is the among line variance of the MA lines,  $V_{L,0}$  is the among line  
264 variance of the PS lines, and  $t$  is the number of generations of MA . Data were standardized by  
265 subtracting the block mean from each data point and dividing the difference by the block mean.  
266 The variance of the standardized data is the squared coefficient of variation, which provides a  
267 standardized measure of the evolvability of a trait [38]. We also standardized the data as a  
268 proportion of the residual (within-line) variance,  $V_E$ ; the "mutational heritability" is calculated as

269 
$$h_M^2 = \frac{V_M}{V_E}.$$

270 Mutational covariances,  $Cov_M$ , and correlations,  $r_M$ , were calculated analogously to  $V_M$ ,  
271 with the among-line components of variance replaced by the among-line components of  
272 covariance.

273 Genotypic variances and covariances of the wild isolates were calculated analogously to  
274 the mutational (co)variances. There is very little residual heterozygosity in the wild isolates [29],  
275 so wild isolates were treated as inbred lines, in which the genotypic variance,  $V_G = \frac{V_L}{2}$ , where  $V_L$   
276 is the among-isolate component of variance [39]. Genetic covariances and correlations were  
277 calculated analogously. Broad-sense heritability,  $H^2 = \frac{V_G}{V_P}$ , where  $V_P$  is the total phenotypic  
278 variance.

279

## 280 *Statistical Analysis*

281 To begin, we considered each combination of *C. elegans* strain (N2 or PB306) and bacterial  
282 species independently. Means and variances were estimated by the general linear model  
283 (GLM)  $y_{ijk} = \mu + a_i + L_{jji} + e_{jkji}$ , where  $y_{ijk}$  is the (mean-standardized) value of  $\hat{p}$  in a replicate,  $\mu$  is the  
284 overall mean (near zero except for a small random deviation because of the mean-  
285 standardization),  $a_i$  is the fixed effect of treatment (MA or G0),  $L_{jji}$  is the random effect of line  
286 (MA or PS) within each treatment group, and  $e_{jkji}$  is the residual effect, assumed normally

287 distributed with mean 0 and variance independent between treatment groups (banded main  
288 diagonal covariance structure). Variances were estimated by restricted maximum likelihood  
289 (REML) with degrees of freedom determined by the method of Kenward and Roger [40], as  
290 implemented in the MIXED procedure of SAS v.9.4. The fixed effect of treatment was tested by  
291 F-test with Type III sums of squares.

292 Genetic covariance matrices (**M** and **G**, respectively) were estimated by REML, as  
293 follows. The diagonal elements of the covariance matrix are the variances in  $\hat{p}_i$  for bacteria  $i$   
294 and the off-diagonal elements are the covariances between  $\hat{p}_i$  and  $\hat{p}_j$  for bacteria  $i$  and  $j$ .  
295 (Co)variances can be partitioned into an among-line and within-line (residual) component. For  
296 each strain/treatment combination, the full GLM is  $y_{ijk} = \mu + L_{j|i} + e_{k|ij}$ , where  $y_{ijk}$  is the (mean-  
297 standardized) value of  $\hat{p}$  in a replicate,  $\mu$  is the overall mean (near zero except for a small  
298 random deviation because of the mean-standardization),  $L_{j|i}$  is the random effect of line  $j$  (MA or  
299 PS) on bacteria  $i$ , and  $e_{k|ij}$  is the residual effect. The  $L_{j|i}$  are distributed (approximately)  $\sim N(0, \mathbf{G})$ ,  
300 with (normalized) mean 0 and covariance structure **G**, as described below. The  $e_{k|ij}$  are  
301 assumed normally distributed  $\sim N(0, \mathbf{R})$  with mean 0 and covariance structure **R**, where the off-  
302 diagonal elements of **R** are constrained to equal 0 (banded main diagonal covariance), since the  
303 replicates assayed in the different pathogens are biologically independent samples.

304 For each strain/treatment (MA or G0) combination, we tested two (G0) or three (MA)  
305 hierarchical models of covariance structure, (1) the full model, with unstructured **G**, (2) banded  
306 main diagonal **G**, in which the off-diagonal elements are constrained to 0, and (3) **G=0**, in which  
307 all elements of **G** are constrained to 0. The best model was decided based on the corrected  
308 AIC [41]. If the best model had more parameters than the next-best model, the models were  
309 compared by likelihood-ratio test (LRT); the models are nested, so twice the difference in the  
310 log(likelihood) is asymptotically chi-square distributed with degrees of freedom equal to the  
311 difference in the number of parameters in the two models. For the G0 PS lines, **G** is necessarily

312 banded main diagonal (if not  $\mathbf{0}$ ), because the PS lines are independent biological samples in the  
313 different pathogen assays.

314 Among-line variances and covariances of the wild isolates were estimated similarly to  
315 those of the MA and PS lines. Variances were estimated from  $\mathbf{G}_{WI}$  with a banded main diagonal  
316 covariance structure and the model compared to a model with  $\mathbf{G}_{WI}=\mathbf{0}$ . Covariances were  
317 estimated jointly from the unconstrained model and compared to the model with  $\mathbf{G}_{WI}$  constrained  
318 to banded main diagonal structure. Note the notational distinction between  $\mathbf{G}_i$  (italicized, with a  
319 subscript) and  $\mathbf{G}$  (no italics or subscript); the former represents the among-line variance-  
320 covariance matrix of group  $i$ , and the latter represents the genetic variance-covariance matrix.

321 The orientations of  $\mathbf{M}$  and  $\mathbf{G}$  in multivariate trait space were compared using the "genetic  
322 line of least resistance" approach, following Schluter [42]. We describe the method here;  
323 justification is provided in the Results. Data ( $\hat{p}_i$ ) were mean-centered and divided by the block  
324 mean, averaged over all observations (MA and G0) in the block. This approach treats block as  
325 a fixed effect and puts all four variables on a common scale. The mutational and genetic  
326 (co)variance matrices ( $\mathbf{M}$  and  $\mathbf{G}$ , estimated as described above) were used as input data in a  
327 Principal Components Analysis (PCA), as implemented in the PRINCOMP procedure in SAS v.  
328 9.4. The first principal component (PC1) is the axis of maximum genetic variance, and evolution  
329 will proceed most rapidly and easily along this axis, be it due to selection or drift [23, 43]. PC1  
330 of  $\mathbf{G}$  is commonly referred to as  $\mathbf{g}_{\max}$  [42]; we follow that convention and refer to PC1 of  $\mathbf{M}$  as  
331 " $\mathbf{m}_{\max}$ ". The deviation in orientation in trait space between  $\mathbf{m}_{\max}$  and  $\mathbf{g}_{\max}$  (or  $\mathbf{m}_{\max,1}$  and  $\mathbf{m}_{\max,2}$ ,  
332 where the subscripts refer to different sets of MA lines) is represented by the angle  $\theta$  between  
333 the two vectors, where  $\theta=\cos^{-1}(\mathbf{m}_{\max}^T \mathbf{g}_{\max})$  [42].

334 If  $\mathbf{m}_{\max}=\mathbf{g}_{\max}$ ,  $\theta=0$ . To test the hypothesis that  $\mathbf{g}_{\max}=\mathbf{m}_{\max}$ , we used a bootstrap  
335 resampling strategy [44]. We resampled MA lines with replacement, re-calculated the among-  
336 line (co)variance matrix, re-ran the PCA, and estimated  $\mathbf{m}_{\max}$  as before; we refer to the  
337 bootstrap estimate as  $\mathbf{m}_{\max}'$ . We then calculated the angle  $\theta'$  between the observed  $\mathbf{m}_{\max}$  and

338 the bootstrap estimate  $\mathbf{m}_{\max}$ '. The fraction of bootstrap replicates ( $n=1000$ ) in which  $\theta' > \theta$  is the  
339 approximate P-value of a test of the null hypothesis that  $\mathbf{g}_{\max}=\mathbf{m}_{\max}$ . Since this analysis takes  
340  $\mathbf{g}_{\max}$  as estimated without error, it is formally a test of the question "How (un)likely is it that a  
341 mutational process with property  $\mathbf{m}_{\max}$  will produce  $\mathbf{G}$  with property  $\mathbf{g}_{\max}$ ". For a more  
342 conservative test, we can also sample wild isolates with replacement to quantify the variation in  
343  $\mathbf{g}_{\max}$ '.

344

## 345 **Results**

346 Survivorship of the N2 G0 progenitor on OP50 (food) sets the benchmark by which the effects of  
347 the other, pathogenic bacteria are assessed. Averaged over assay blocks, the N2 progenitor  
348 suffered approximately 11% mortality over the course of the 120 hr assay. Relative to that  
349 benchmark, survivorship was further reduced by as little as 1.5% in the PB306 G0 progenitor on  
350 OP50 and by as much as 84% in the N2 G0 progenitor on *PA14*. Averaged over strains and  
351 treatment groups (MA and G0), the relative pathogenicity of the three pathogenic bacteria is  
352  $OP50 < E. faecalis < S. aureus \ll PA14$  (**Supplemental Figure S2; Supplemental Table S5**).

353

### 354 *Mutation Accumulation (MA) lines*

355 (i) Means. We expect that survival on OP50 (food) should be unambiguously beneficial, and  
356 both N2 and PB306 do exhibit a significant negative mutational bias on OP50 (**Table 1; Figure**  
357 **3A**). Predictions about the direction of selection for survivorship on pathogenic bacteria are less  
358 clear, because fitness tradeoffs between disease resistance and traits such as growth rate and  
359 yield in the absence of pathogens are well-documented [45-48]. All else equal, however, living  
360 is better than dying.

361 Whether the deleterious effects of mutations are, on average, exacerbated under  
362 stressful conditions is a topic of active empirical investigation (e.g., [49-51]), but there is no  
363 theoretical reason to expect them to be [52]. Infection by a pathogen is *prima facie* a stressful



364 condition. If the average deleterious effect is increased under pathogen stress, we predict that  
365  $\Delta M$  will be greater (more negative) in the pathogen treatments than in the OP50 treatment, and  
366 moreover, that  $\Delta M$  will be greatest (most negative) in the most virulent pathogen, *PA14*.

367

368

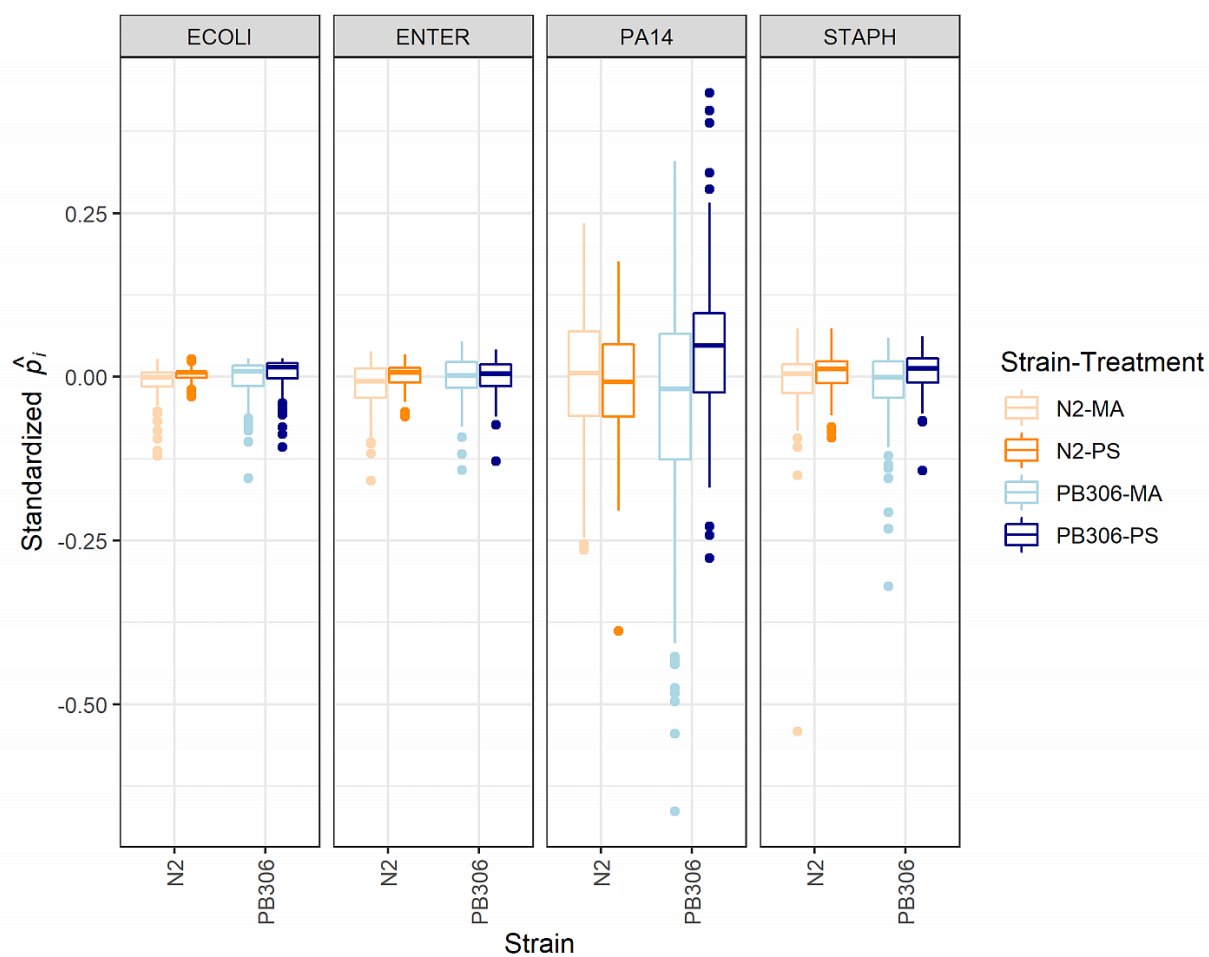

369

370 **Figure 3.** Box-plots of  $\hat{p}$  standardized by the block mean (mean = 0). The four panels show the  
371 four different bacteria, from left to right (A-D): (A) *E. coli* OP50 (ECOLI), (B) *E. faecalis*  
372 (ENTER), (C) *P. aeruginosa* PA14 (PA14), and (D) *S. aureus* (STAPH). N2 is shown in orange,  
373 PB306 in blue; G0 PS lines shown in dark color, MA lines in light color. See Methods for  
374 details of  $\hat{p}$  standardization.

375 **Table 1.** Means (SEM). See Methods for derivation of  $\hat{p}$  and details of standardization, and for calculation of  $\Delta M$ . Values of  $\Delta M$  in  
 376 bold font are significantly different from 0 ( $P < 0.05$ ); see Methods for details of statistical tests.

| Strain | Treatment |                  | OP50                      | <i>E. faecalis</i>        | PA14                       | <i>S. aureus</i>          |
|--------|-----------|------------------|---------------------------|---------------------------|----------------------------|---------------------------|
| N2     | G0        | $\hat{p}$ (raw)  | 0.987 (0.0054)            | 0.971 (0.0047)            | 0.744 (0.0254)             | 0.949 (0.0078)            |
|        |           | $\hat{p}$ (std)  | 0.00369 (0.00124)         | 0.00590 (0.00176)         | -0.00764 (0.00869)         | 0.00487 (0.00359)         |
|        | MA        | $\hat{p}$ (raw)  | 0.980 (0.0067)            | 0.958 (0.0075)            | 0.764 (0.0079)             | 0.941 (0.0029)            |
|        |           | $\hat{p}$ (std)  | -0.00305 (0.00178)        | -0.00714 (0.00388)        | 0.01089 (0.00869)          | -0.00228 (0.00299)        |
|        |           | $\Delta M$ (std) | <b>-2.70E-5</b> (0.87E-5) | <b>-5.22E-5</b> (1.70E-5) | 7.41E-5 (8.69E-5)          | -2.86E-5 (1.87E-5)        |
| PB306  | G0        | $\hat{p}$ (raw)  | 0.986 (0.0061)            | 0.953 (0.0100)            | 0.868 (0.010)              | 0.948 (0.0105)            |
|        |           | $\hat{p}$ (std)  | 0.00608 (0.00270)         | 0.00142 (0.00238573)      | 0.04476 (0.01065)          | 0.01498 (0.00321)         |
|        | MA        | $\hat{p}$ (raw)  | 0.976 (0.0025)            | 0.950 (0.0026)            | 0.757 (0.0474)             | 0.928 (0.0086)            |
|        |           | $\hat{p}$ (std)  | -0.00326 (0.00270)        | -0.00117 (0.00289)        | -0.03275 (0.01671)         | -0.00362 (0.00421)        |
|        |           | $\Delta M$ (std) | <b>-3.74E-5</b> (1.59E-5) | -1.04E-5 (1.50E-5)        | <b>-31.00E-5</b> (7.93E-5) | <b>-7.44E-5</b> (2.12E-5) |
| Ave    |           | $\Delta M$ (std) | -3.12E-05                 | -3.13E-05                 | -19.20E-5                  | -5.15E-05                 |

377 In general, support for those predictions is weak.  $\Delta M$  is negative in five of the six  
378 strain/pathogen combinations, although not significantly different from zero in three of the six. In  
379 two of the six cases,  $\Delta M$  is less negative in the pathogen than in the N2 progenitor on OP50,  
380 and in one of the four cases in which the point estimate of  $\Delta M$  is more negative than the N2  
381 progenitor on OP50 (N2 on *S. aureus*), the estimate is not significantly different from 0. The  
382 prediction that  $\Delta M$  should be greatest in *PA14* is borne out for PB306, but not for N2;  $\Delta M$  in N2  
383 is positive (albeit not significantly different from zero). However, survival of the N2 progenitor on  
384 *PA14* was already so low (~96% mortality by 120 hours; **Supplemental Figure S2**) that  
385 presumably there was little opportunity for mutations to make things worse.

386 (ii) (Co)variances. To begin, we estimated the among-line components of variance jointly over  
387 the four bacteria for the MA lines in each strain, i.e.  $\mathbf{G}_{MA}$  was modeled with a banded main  
388 diagonal covariance structure (see Methods) and tested for significance by LRT against a model  
389 with  $\mathbf{G}_{MA}=\mathbf{0}$ .  $\mathbf{G}_{MA}$  differed significantly from  $\mathbf{0}$  in both strains (N2, Chi-square=15.0, df=6,  
390  $p<0.002$ ; PB306, Chi-square=49.8, df=6,  $p<<0.0001$ ). The among-MA line (co)variance  $\mathbf{G}_{MA}$   
391 includes the cumulative effects of mutation, as well as the effects of heritable, non-genetic  
392 variation [30]. The sum of the variances (the trace) is the overall size of  $\mathbf{G}_{MA}$ .  $\mathbf{G}_{MA}$  is >5X  
393 greater in PB306 than in N2 (LRT chi-square=18.1, df=4,  $P<0.01$ ), although the difference is  
394 less than twofold when *PA14* is excluded (LRT chi-square=7.3, df=3,  $P<0.07$ ; **Table 2**).

395 **Table 2.** Variances in standardized  $\hat{p}$  (SEM). Abbreviations are:  $V_L$  (among-line variance);  $V_E$  (environmental variance);  $V_M$   
 396 (mutational variance);  $h_m^2$  (mutational heritability);  $r_{M,W}$  (correlation between line mean  $\hat{p}$  and competitive fitness;  $V_G$  (genetic  
 397 variance);  $H^2$  (broad-sense heritability).

| Strain |             | OP50                | <i>E. faecalis</i>  | PA14                | <i>S. aureus</i>    |
|--------|-------------|---------------------|---------------------|---------------------|---------------------|
| N2     | $V_L$ (MA)  | 0.000056 (0.000033) | 0.000365 (0.000163) | 0.001796 (0.001163) | 0.000086 (0.000106) |
|        | $V_L$ (PS)  | 4.54E-6 (6.91E-6)   | 0                   | 0.000128 (0.000357) | 0.000254 (0.000118) |
|        | $V_E$ (MA)  | 0.000236 (0.000036) | 0.000624 (0.000127) | 0.008323 (0.001308) | 0.001034 (0.000135) |
|        | $V_E$ (PS)  | 0.000114 (0.000016) | 0.000334 (0.000046) | 0.006918 (0.000961) | 0.000664 (0.000111) |
|        | $V_M$ (std) | 1.03E-07            | 7.30E-07            | 3.34E-06            | 0                   |
|        | $h_m^2$     | 5.89E-04            | 1.52E-03            | 4.38E-04            | 0                   |
| PB306  | $V_L$ (MA)  | 0.00028 (0.000093)  | 0.000172 (0.000086) | 0.01083 (0.003134)  | 0.000396 (0.000219) |
|        | $V_L$ (PS)  | 0.000026 (0.00003)  | 0.000019 (0.000061) | 0                   | 0.000041 (0.000096) |
|        | $V_E$ (MA)  | 0.000538 (0.000075) | 0.000631 (0.000091) | 0.01663 (0.002199)  | 0.001479 (0.00023)  |
|        | $V_E$ (PS)  | 0.000408 (0.000059) | 0.000521 (0.000092) | 0.0143 (0.001809)   | 0.000789 (0.000147) |
|        | $V_M$ (std) | 5.08E-07            | 3.06E-07            | 2.17E-05            | 7.10E-07            |
|        | $h_m^2$     | 1.07E-03            | 5.31E-04            | 1.40E-03            | 6.26E-04            |

|          |             |                    |                     |                     |                      |
|----------|-------------|--------------------|---------------------|---------------------|----------------------|
|          | $r_{M,w}$   | -0.001 (0.238)     | -0.075 (0.311)      | -0.114 (0.205)      | 0.431 (0.247)        |
| Ave      | $V_M$ (std) | 3.06E-07           | 5.18E-07            | 1.25E-05            | 3.55E-07             |
| Ave      | $h_m^2$     | 8.31E-04           | 1.03E-03            | 9.19E-04            | 3.13E-04             |
| Wild     | $V_G$       | 0.000282 (.000081) | 0.000038 (.000028)  | 0.000765 (.000217)  | 0.000238 (0.0000675) |
| Isolates | $V_E$       | 0.00036 (0.000064) | 0.000455 (0.000074) | 0.001163 (0.000196) | 0.000291 (0.000048)  |
|          | $H^2$       | 0.305              | 0.072               | 0.284               | 0.31                 |

398

399  $\mathbf{G}_{PS}$  includes only the contribution of non-genetic heritable variation. The same analysis  
400 for the PS lines has less power than for the MA lines because there are fewer PS lines than MA  
401 lines (PB306, n=6,9,39,39 for *PA14*, *OP50*, *E. faecalis*, and *S. aureus*, respectively; N2,  
402 n=9,9,39,39 for the same pathogens). For PB306,  $\mathbf{G}_{PS}=\mathbf{0}$  is the best model ( $\Delta\text{AICc} = -4.4$ ), and  
403 for all four bacteria the point estimate of the among-line variance of the MA lines is an order of  
404 magnitude greater than that of the PS lines (**Table 2**). In N2, however, the banded main  
405 diagonal model is significantly better than the alternative model with  $\mathbf{G}_{PS}=\mathbf{0}$  ( $\Delta\text{AICc} = -2.0$ ; LRT  
406 Chi-square=8.2, df=6, p<0.05). That result is driven by the variance on *S. aureus*, which is ~3X  
407 greater among PS lines than among MA lines (**Table 2**).

408 In principle, the mutational covariance matrix  $\mathbf{M}=\mathbf{G}_{MA}-\mathbf{G}_{PS}$  [53, 54]. Ideally,  $\mathbf{G}_{PS}=\mathbf{0}$  (i.e.,  
409 there is no heritable (co)variance among PS lines), in which case  $\mathbf{M}=\mathbf{G}_{MA}$ . However, since we  
410 have no estimate of the off-diagonal elements of  $\mathbf{G}_{PS}$  (see Methods), we are left with two  
411 choices: either assume that  $\mathbf{G}_{PS}=\mathbf{0}$  and forge ahead, or stop. Clearly, it is unjustified to assume  
412 that  $\mathbf{G}_{PS}=\mathbf{0}$  in N2, whereas there is statistical justification for assuming that  $\mathbf{G}_{PS}=\mathbf{0}$  in PB306.  
413 What we can say with some confidence is, if there are non-genetic factors that contribute to  
414 heritable (co)variance, their cumulative effects are about an order of magnitude less than those  
415 of mutation except in the case of N2 on *S. aureus*. Accordingly, we will forge ahead and  
416 assume that  $\mathbf{M}$  is as inferred from  $\mathbf{G}_{MA}$  in PB306, although the tenuousness of that assumption  
417 is manifest.

418 One of our primary goals was to compare  $\mathbf{M}_{N2}$  to  $\mathbf{M}_{PB306}$  (i.e  $\mathbf{M}$  estimated from each set of  
419 MA lines) to better characterize variation in the mutational process in the context of the  
420 multivariate phenotype. The fact that  $\mathbf{G}_{PS}\neq\mathbf{0}$  for N2 negates that possibility. However,  $\mathbf{G}_{MA}$   
421 represents the combined contribution of mutational and transgenerational epigenetic effects to  
422 the heritable variation among MA lines. We redefine  $\mathbf{G}_{MA}$  as the (epi)mutation matrix  $\mathbf{M}^*$ , to  
423 explicitly acknowledge the potential contribution of epigenetic factors in addition to the  
424 cumulative effects of mutation, and similarly redefine PC1 of  $\mathbf{M}^*$  to  $\mathbf{m}^*_{\max}$ . The assay of wild

425 isolates was not designed to partition the heritable variance into genetic and non-genetic  
426 components, so we re-define  $\mathbf{G}$  as  $\mathbf{G}^*$ , the (epi)genetic variance-covariance matrix, and similarly  
427 redefine  $\mathbf{g}_{\max}$  as  $\mathbf{g}^*_{\max}$ .

428 Turning first to  $V_M$ , mutational heritabilities ( $h_M^2 = \frac{V_M}{V_E}$ ) for all four pathogens are on the  
429 order of  $0.5\text{-}1 \times 10^{-3}$ /generation (**Table 2**), which is typical for a wide range of traits in a variety of  
430 organisms [55], including *C. elegans* [56]. Etienne et al. [33] previously estimated mutational  
431 parameters for survival on *PA14* of (almost) the same set of PB306 MA lines. The survival  
432 assay and measure of survivorship in the Etienne et al. study (spotted bacterial lawn, LT50)  
433 both differed from this study (spread lawn,  $\hat{p}$ ), but the estimated  $h_M^2$  of LT50 was  $\sim 1 \times 10^{-3}$   
434 /generation, very close to the estimate from this study.

435 The (epi)mutational covariance/correlation matrices  $\mathbf{M}^*$  as inferred from  $\mathbf{G}_{MA}$  are shown  
436 in **Table 3**. Two features of  $\mathbf{M}^*$  are evident: the correlations between survival on the actual  
437 pathogens (i.e., all except OP50) are large and positive ( $>0.5$ ) and at least marginally  
438 significant, whereas the correlations between survival on OP50 and on the pathogens are much  
439 smaller.

440 The first principal component of  $\mathbf{M}^*$  ( $\mathbf{m}^*_{\max, \text{PB306}}$ ) accounts for  $\sim 99\%$  of the variance  
441 among PB306 MA lines, and  $\mathbf{m}^*_{\max, \text{N2}}$  explains nearly as much in N2 (**Supplemental Table S6**).  
442 The appropriateness of drawing evolutionary inferences from comparisons of principal  
443 components of  $\mathbf{G}$  has been criticized on the grounds that "... (evolutionarily) causal factors need  
444 not have orthogonal effects on the phenotype" [57], but when essentially all of the heritable  
445 variance falls along PC1, the "genetic lines of least resistance" approach seems reasonable,  
446 since there is hardly any unexplained variance about which the constraint of orthogonality could  
447 be misleading.

448 The difference in orientation of  $\mathbf{m}^*_{\max, \text{PB306}}$  and  $\mathbf{m}^*_{\max, \text{N2}}$  does not differ from the random  
449 expectation ( $\theta=0.214$ ,  $P>0.80$ ). We therefore pooled samples over the two sets of MA lines and



450 **Table 3.** (Epi)mutational variance-covariance matrices **M\*** (SEM). (Co)variances shown above/on the diagonal in dark shading;  
 451 correlations shown below the diagonal in light shading. See Methods for details of calculations.

| Strain | Tr | Bacteria           | OP50              | <i>E. faecalis</i> | PA14               | <i>S. aureus</i>   |
|--------|----|--------------------|-------------------|--------------------|--------------------|--------------------|
| PB306  | MA | OP50               | 2.82E-4 (0.94E-4) | 0.21E-5 (0.65E-5)  | -4.70E-4 (3.99E-4) | 1.18E-4 (0.94E-4)  |
|        |    | <i>E. faecalis</i> | 0.10 (0.30)       | 1.66E-4 (0.85E-4)  | 6.80E-4 (3.57E-4)  | 1.62E-4 (0.90E-4)  |
|        |    | PA14               | -0.27 (0.22)      | 0.51 (0.24)        | 1.09E-2 (0.32E-2)  | 1.42E-3 (0.60E-3)  |
|        |    | <i>S. aureus</i>   | 0.34 (0.27)       | 0.62 (0.33)        | 0.67 (0.23)        | 4.15E-4 (0.22E-4)  |
| N2     | MA | OP50               | 5.60E-5 (3.30E-5) | -3.00E-5 (5.60E-5) | 2.40E-5 (1.18E-4)  | 6.35E-6 (4.30E-5)  |
|        |    | <i>E. faecalis</i> | -0.19 (0.41)      | 3.41E-4 (1.61E-4)  | 8.80E-5 (3.28E-4)  | 1.68E-4 (0.95E-4)  |
|        |    | PA14               | 0.075 (0.37)      | 0.11 (0.42)        | 1.80E-3 (1.16E-3)  | -1.20E-4 (2.69E-4) |
|        |    | <i>S. aureus</i>   | 0.95 (0.65)       | 1 (-)              | -0.31 (0.72)       | 7.90E-5 (1.06E-4)  |

452

453

454 re-calculated  $\mathbf{m}^*_{\max}$  for comparison to  $\mathbf{g}^*_{\max}$ . The difference in orientation between  $\mathbf{m}^*_{\max}$  and  
455  $\mathbf{g}^*_{\max}$  also does not differ from the random expectation ( $\theta=0.409$ ,  $P>0.64$ ). In hindsight, the  
456 similarity of orientation in trait space between  $\mathbf{M}^*$  and  $\mathbf{G}^*$  was predictable, given that PA14  
457 explains the largest component of the variance in both MA lines and wild isolates (**Table 2**).  
458 (iii) Mutational correlations with relative competitive fitness. Under the MA conditions (20°C,  
459 NGM plates, fed on OP50), the PB306 MA lines decline in competitive fitness at about  
460 0.1%/generation ( $\Delta M_w = -1.13 \pm 0.25 \times 10^{-3}/\text{gen}$ ), very close to the estimate of  $\Delta M_w$  for N2 in the  
461 same assay (-1.09/gen [32]). Mutational correlations ( $r_M$ ) between  $\hat{p}_i$  on pathogen  $i$  and relative  
462 competitive fitness are shown in **Table 2**.  $r_M$  between  $\hat{p}$  on OP50 and competitive fitness in the  
463 MA environment is  $\sim 0$ , consistent with the 27X greater (more negative) rate of mutational decay  
464 of competitive fitness than of  $\hat{p}$  on OP50 (**Table 1**). Although there is significant mutational  
465 variance for survivorship on OP50 at 25°C over the course of 120 hrs, the relevant mutations  
466 evidently have no consistent effect on competitive fitness under the MA conditions. Similarly,  $r_M$   
467 between relative fitness and  $\hat{p}_i$  on *E. faecalis* and PA14 is also near 0; only with *S. aureus* is  
468 there a marginally significant mutational correlation ( $r_M=0.43$ ,  $P<0.1$ ).

469

#### 470 *Wild isolates*

471 The standing (epi)genetic (co)variances ( $\mathbf{G}^*$ ) and correlations are given in **Table 4**. The full  
472 (unconstrained) model of  $\mathbf{G}^*$  provided the best fit ( $\Delta\text{AICc}=3.5$ , LRT chi-square=16.2,  $\text{df}=6$ ,  
473  $P<0.02$ ), with highly significant  $V_G$  ( $p<0.001$ ) for all pathogens except *E. faecalis* (LRT chi-  
474 square=2.6,  $\text{df}=1$ ,  $P>0.10$ ). Broad-sense heritability,  $H^2$ , is approximately 30% for all bacteria  
475 except *E. faecalis*, for which  $H^2=7\%$ . The lower  $H^2$  on *E. faecalis* is a result of lower  $V_G$  rather  
476 than greater  $V_E$ , which is not much greater than on OP50 or *S. aureus*, and less than for PA14  
477 (**Table 2**).

478 Heuristic comparison of  $\mathbf{G}^*$  with  $\mathbf{M}^*$  reveals several noteworthy features. First, the rank  
479 orders of the mutational and standing (epi)genetic variances ( $V_M$  and  $V_G$ ) are similar, with PA14

480 having the greatest variance and *E. faecalis* the least, with OP50 and *S. aureus* intermediate.

481 This finding is expected.  $V_M$  typically predicts  $V_G$  with high confidence for a variety of traits in

482

483 **Table 4.** Standing (epi)genetic variance-covariance matrix,  $\mathbf{G}^*$  (SEM). (Co)variances shown

484 above/on the diagonal in dark shading; correlations shown below the diagonal in light shading.

485 See Methods for details of calculations.

| Bacteria           | OP50              | <i>E. faecalis</i> | PA14              | <i>S. aureus</i>   |
|--------------------|-------------------|--------------------|-------------------|--------------------|
| OP50               | 5.64E-4 (1.62E-4) | 1.04E-4 (0.67E-4)  | 3.78E-4 (1.87E-4) | -0.70E-4 (1.22E-4) |
| <i>E. faecalis</i> | 0.51 (0.31)       | 0.76E-4 (0.56E-4)  | 3.28E-4 (1.20E-4) | 0.70E-4 (0.62E-4)  |
| PA14               | 0.41 (0.17)       | 0.96 (0.32)        | 1.53E-3 (0.43E-3) | -0.40E-4 (2.07E-4) |
| <i>S. aureus</i>   | -0.13 (0.23)      | 0.37 (0.32)        | -0.045 (0.24)     | 4.76E-4 (1.35E-4)  |

486

487 disparate organisms [58-61]. The rank order is not an artifact of mean-scaling; it is the same for

488 the unscaled  $\hat{p}$ . Second,  $r_M$  and  $r_G$  are themselves uncorrelated ( $r = -0.14$ ). That result

489 indicates that, at minimum, pleiotropy is not unbreakably strong. However, the standing genetic

490 correlation between  $\hat{p}$  on *E. faecalis* and  $\hat{p}$  on PA14 is nearly 1 ( $r_G=0.96$ ), although an inference

491 based on a correlation between two variables, one of which the variance is not significantly

492 different from zero (*E. faecalis*), is not robust.

493

## 494 Discussion

495

### 496 *Consistency and idiosyncrasy*

497 The average number of base-substitution and small indel mutations per genome is nearly

498 identical between the N2 and PB306 MA lines [29], and, although the data are limited, it

499 appears that the (probably small) number of larger structural variants is similar between the two

500 strains as well (A. S. Saxena and Baer, unpublished results). Thus, differences between the  
501 two strains in the cumulative effects of mutations are evidently the result of differences in the  
502 distribution of mutational effects (DME), rather than differences in the total number of mutations.

503 One reassuring consistency is the congruence of the results of this study with the  
504 findings of a previous assay of (nearly) the same set of PB306 MA lines on *PA14* [33]. Given  
505 the ubiquity of block effects (in this study, and in general), it was a distinct possibility that the  
506 outcome of two experiments in the same set of lines, seven years apart and performed by  
507 different people, would be very different. Although the details of the assays and the measures  
508 of survivorship differ between the two studies,  $h_m^2$  and  $V_M$  are both within 20%. The mutational  
509 bias,  $\Delta M$ , is about 3X greater (more negative) in this study than in the previous one, but the  
510 orders of magnitude ( $\sim 10^{-4}$ /gen) are similar, and substantially greater than for the other, less  
511 virulent bacteria (**Table 1**).

512 Given the relatively consistent behavior of PB306 from one assay to the next, the  
513 discrepancy between PB306 and N2 on *PA14* is all the more striking.  $V_M$  is more than sixfold  
514 greater in PB306 than in N2, and the discrepancy cannot be attributed to inflated among-line  
515 variance in the G0 PS lines in N2 (**Table 2**). Contrast that result with those on *S. aureus*, in  
516 which the among-MA line variance in PB306 is  $\sim 4$ X greater than in N2, but the among-PS line  
517 variance in N2 is almost as large as the variance among MA lines.

518 That the among-PS line variances ( $G_{PS}$ ) are significantly different from **0** in N2 but not in  
519 PB306 warrants further scrutiny. The significant difference is entirely due to *S. aureus*; for the  
520 other three bacteria, the variance among the MA lines is  $\sim 10$ X greater than among PS lines, just  
521 as for PB306. Further, the among-PS line variance in N2 is not a result of just a couple of  
522 outlying lines; the distribution of PS line means has a distinct left tail reminiscent of the typical  
523 distribution of MA lines (**Supplemental Figure S4**). Type I error notwithstanding, the proximate  
524 cause of heritable variation among genetically identical lines is transgenerational epigenetic  
525 inheritance [62-65] which can have various ultimate causes, including starvation [66, 67],

526 various types of abiotic stress [67-69], and exposure to pathogens [70, 71], as well as random,  
527 spontaneous epimutation [31]. Any of those are plausible causes of variation among N2 PS  
528 lines. Whether N2 is inherently more prone to transgenerational epigenetic variation (in the lab  
529 environment) than PB306, or wild isolates in general, is not known, although epigenetic  
530 modifications have an underlying genetic basis.

531 Does the evidently different DME in N2 and PB306 provide additional insight into  
532 evolution? It is tempting to think that the same (average) number of mutations with different  
533 cumulative effects in different backgrounds implies that mutations must interact epistatically.  
534 However, the observable (not observed, in this instance) DME represents a sample from some  
535 underlying true DME. In principle, one could model the (multivariate) DME for both genotypes  
536 and compare the best model with a single underlying DME to the best model with two DMEs,  
537 one for each genotype. We do not pursue that line of inquiry here.

538

### 539 *Natural selection*

540 The finding that  $\Delta M < 0$  in all but one case (N2 on *PA14*) implies that mutations that reduce  
541 survival upon exposure to pathogenic bacteria are deleterious, on average. That is not  
542 surprising in hindsight, although it is certainly plausible that fitness tradeoffs could result in  
543 stabilizing selection on pathogen susceptibility. The lack of correlation between survival on  
544 pathogens with competitive fitness in the MA environment indicates that pleiotropy between  
545 mutational effects in the two contexts is not strong, but reveals little about selection in the  
546 natural environment.

547 To get a rough idea of how strong selection on these traits is, the neutral expectation  
548 provides a benchmark. For a neutral trait in a predominantly selfing organism such as *C.*  
549 *elegans*, at mutation-drift equilibrium,  $V_G \approx 4N_e V_M$  [11].  $N_e$  in *C. elegans* has been estimated to  
550 be on the order of  $10^5$  [72], so if  $V_M \approx 5 \times 10^{-5}$ , as for  $\hat{p}$  on OP50, we expect  $V_G \approx 2$ , about a  
551 thousand times greater than the observed value. The discrepancy grows to about ten

552 thousand-fold for  $\hat{p}$  on *PA14*. Although there is considerable uncertainty associated with all of  
553 these estimates, clearly, the ability to survive exposure to pathogenic bacteria is not a neutral  
554 trait.

555         If selection is sufficiently strong to be approximately deterministic (i.e., ignoring drift), at  
556 mutation-selection balance,  $V_G \approx \frac{V_M}{s}$ , where  $s$  represents the average strength of selection  
557 against a mutation affecting the trait [15]; see [17] for caveats. By that calculation,  $s \approx 0.002$  for  
558 mutations affecting  $\hat{p}$  on *OP50*, and about an order of magnitude stronger ( $s \approx 0.03$ ) on the  
559 virulent pathogen *PA14*. Selection on the two less-virulent pathogens is intermediate,  $s \approx 0.009$   
560 on *E. faecalis* and  $s \approx 0.004$  on *S. aureus*. By way of comparison, a similar calculation for  
561 competitive fitness (measured in the MA conditions) revealed  $s \approx 0.005$  [32], which was in close  
562 agreement with a direct estimate of the average mutational effect  $\bar{s} \approx 0.0035$ , calculated by  
563 dividing the cumulative decline in competitive fitness of the MA lines by the average number of  
564 mutations carried by an MA line. These point estimates are obviously rough, but it is evident  
565 that mutations that affect susceptibility to pathogens experience significant selection in nature.  
566 Whether the selection is direct, imposed by exposure to pathogens in nature, or indirect, due to  
567 pleiotropic effects on fitness in the absence of pathogens, cannot be ascertained from these  
568 experiments. However, the absence of a mutational correlation between  $\hat{p}$  and relative fitness  
569 (in the MA context) implies that it might be the former. Recent studies have revealed a complex  
570 transgenerational epigenetically inherited (TEI) behavioral response to the *PA14* strain of *P.*  
571 *aeruginosa* that varies among wild isolates [73], which strongly reinforces the inference that  
572 *PA14* imposes significant direct selection in nature.

573         Mutation-selection balance (MSB) is not the only possible mechanism by which genetic  
574 variation may be maintained; balancing selection (BS) is another. There are several well-  
575 documented balanced polymorphisms in *C. elegans* (summarized in [74]), and there are  
576 numerous examples from diverse organisms in which pathogens do contribute to BS [75-78].

577 An important theoretical consideration is that, if BS is the predominant mechanism responsible  
578 for the maintenance of genetic variation, there is no reason to expect  $V_G$  and  $V_M$  to be  
579 correlated. In fact, to the extent that anyone has looked,  $V_M$  and  $V_G$  are invariably highly  
580 positively correlated, as they are in this study. BS and MSB are often set up as alternative  
581 hypotheses for the maintenance of genetic variation, but it is realistic to expect that uniformly  
582 deleterious alleles will always contribute to trait variation, whereas balanced polymorphisms  
583 may or may not. If that scenario is generally true, the effect of BS would be to weaken the  
584 relationship between  $V_M$  and  $V_G$ , and that does not seem to be the case. If, in contrast, BS is  
585 the exception rather than the rule, the occasional trait experiencing BS would appear as a high  
586 outlier, with more  $V_G$  than predicted by its  $V_M$ , and selection as inferred from the ratio of  $V_M$  to  $V_G$   
587 would appear anomalously weak. The strength of selection for survival on OP50 (food) is  
588 similar to the strength of selection on competitive fitness, and selection on the three pathogens  
589 is stronger still. Thus, although BS may contribute to maintenance of genetic variation for  
590 susceptibility to bacterial pathogens in some (or even many) cases, our results provide no  
591 support for that hypothesis.

592

### 593 *Conclusions*

594 1. With one exception (N2 on *PA14*), the cumulative effect of mutations is to increase  
595 susceptibility to pathogens. Moreover, survival upon exposure to pathogens is uncorrelated  
596 with competitive fitness under the MA conditions. Thus, there is little support for the existence  
597 of tradeoffs between susceptibility to pathogens and fitness in the absence of pathogens.

598 2. To the extent that  $\mathbf{M}^*$  and  $\mathbf{G}^*$  are reliable estimators of  $\mathbf{M}$  and  $\mathbf{G}$ , respectively, it is evident that  
599 survival on these bacteria is subject to effective selection (because  $\mathbf{G} \ll 2N_e\mathbf{M}$ ), but also that  $\mathbf{M}^*$   
600 is a sufficient predictor of the orientation of  $\mathbf{G}^*$  in multivariate trait space (because  $\mathbf{g}_{max}^*$  is not  
601 significantly different from  $\mathbf{m}_{max}^*$ ).

602 3. The strength of selection against mutations underlying susceptibility to pathogens, as inferred  
603 from the ratio  $V_M/V_G$ , is commensurate with selection against mutations affecting competitive  
604 fitness. Our results provide no evidence that genetic variation for susceptibility to bacterial  
605 pathogens is maintained by balancing selection.

606

### 607 **Acknowledgments**

608 Q. Allen, J. Dembek, D. Feistel, M. Puentes, A. Shoucair, and M. Snyder provided assistance in  
609 the laboratory. J. M. Ponciano suggested  $\hat{p}$  as the measure of survival. Support was provided  
610 by NIH awards GM107227 to CFB, E.C. Andersen, and J. M. Ponciano, and GM127433 to CFB  
611 and V. Katju.



## 612 References Cited

- 613 [1] Haldane, J.B.S. 1949 Disease and evolution. *La Ricerca Scientifica* **19**, 68-76.
- 614 [2] Hamilton, W.D. 1980 Sex versus non-sex versus parasite. *Oikos* **35**, 282-290. (doi:10.2307/3544435).
- 615 [3] Rockett, K.A., Clarke, G.M., Fitzpatrick, K., Hubbart, C., Jeffreys, A.E., Rowlands, K., Craik, R., Jallow,  
616 M., Conway, D.J., Bojang, K.A., et al. 2014 Reappraisal of known malaria resistance loci in a large  
617 multicenter study. *Nature Genetics* **46**, 1197-1204. (doi:10.1038/ng.3107).
- 618 [4] Barton, N.H. 1995 A general model for the evolution of recombination. *Genetical Research* **65**, 123-  
619 144.
- 620 [5] Lefebvre, A. & Palloix, A. 1996 Both epistatic and additive effects of QTLs are involved in polygenic  
621 induced resistance to disease: A case study, the interaction pepper - *Phytophthora capsici* Leonian.  
622 *Theoretical and Applied Genetics* **93**, 503-511.
- 623 [6] Daub, J.T., Hofer, T., Cutivet, E., Dupanloup, I., Quintana-Murci, L., Robinson-Rechavi, M. & Excoffier,  
624 L. 2013 Evidence for Polygenic Adaptation to Pathogens in the Human Genome. *Molecular Biology and*  
625 *Evolution* **30**, 1544-1558. (doi:10.1093/molbev/mst080).
- 626 [7] Hill, A.V.S. 2001 The genomics and genetics of human infectious disease susceptibility. *Annual Review*  
627 *of Genomics and Human Genetics* **2**, 373-400. (doi:10.1146/annurev.genom.2.1.373).
- 628 [8] Cogni, R., Cao, C., Day, J.P., Bridson, C. & Jiggins, F.M. 2016 The genetic architecture of resistance to  
629 virus infection in *Drosophila*. *Mol. Ecol.* **25**, 5228-5241. (doi:10.1111/mec.13769).
- 630 [9] Band, G., Le, Q.S., Clarke, G.M., Kivinen, K., Hubbart, C., Jeffreys, A.E., Rowlands, K., Leffler, E.M.,  
631 Jallow, M., Conway, D.J., et al. 2019 Insights into malaria susceptibility using genome-wide data on  
632 17,000 individuals from Africa, Asia and Oceania. *Nat. Commun.* **10**. (doi:10.1038/s41467-019-13480-z).
- 633 [10] Kimura, M. & Ohta, T. 1971 Protein polymorphism as a phase of molecular evolution. *Nature* **229**,  
634 467-&. (doi:10.1038/229467a0).
- 635 [11] Lynch, M. & Hill, W.G. 1986 Phenotypic evolution by neutral mutation. *Evolution* **40**, 915-935.
- 636 [12] Hudson, R.R., Kreitman, M. & Aguade, M. 1987 A test of neutral molecular evolution based on  
637 nucleotide data. *Genetics* **116**, 153-159.
- 638 [13] Haldane, J.B.S. 1927 A mathematical theory of natural and artificial selection, Part V: Selection and  
639 mutation. *Proceedings of the Cambridge Philosophical Society* **23**, 838-844.
- 640 [14] Clayton, G. & Robertson, A. 1955 Mutation and quantitative variation. *American Naturalist* **89**, 151-  
641 158. (doi:10.1086/281874).
- 642 [15] Barton, N.H. 1990 Pleiotropic models of quantitative variation. *Genetics* **124**, 773-782.
- 643 [16] Kondrashov, A.S. & Turelli, M. 1992 Deleterious mutations, apparent stabilizing selection and the  
644 maintenance of quantitative variation. *Genetics* **132**, 603-618.
- 645 [17] Charlesworth, B. 2015 Causes of natural variation in fitness: Evidence from studies of *Drosophila*  
646 populations. *Proceedings of the National Academy of Sciences of the United States of America* **112**,  
647 1662-1669. (doi:10.1073/pnas.1423275112).
- 648 [18] Gould, S.J. & Lewontin, R.C. 1979 The spandrels of San Marco and the Panglossian paradigm: A  
649 critique of the adaptationist programme. *Proceedings of the Royal Society Series B-Biological Sciences*  
650 **205**, 581-598. (doi:10.1098/rspb.1979.0086).
- 651 [19] Lande, R. 1980 The genetic covariance between characters maintained by pleiotropic mutations.  
652 *Genetics* **94**, 203-215.
- 653 [20] Phillips, P.C. & McGuigan, K.L. 2006 Evolution of genetic variance-covariance structure. In  
654 *Evolutionary Genetics: Concepts and Case Studies* (eds. C.W. Fox & J.B. Wolf), pp. 310-325. Oxford, UK,  
655 Oxford University Press.
- 656 [21] Kimura, M. 1962 On probability of fixation of mutant genes in a population. *Genetics* **47**, 713-719.
- 657 [22] Ewens, W.J. 1969 *Population Genetics*. London, Methuen and Company.

- 658 [23] Phillips, P.C., Whitlock, M.C. & Fowler, K. 2001 Inbreeding changes the shape of the genetic  
659 covariance matrix in *Drosophila melanogaster*. *Genetics* **158**, 1137-1145.
- 660 [24] Mukai, T. 1964 Genetic structure of natural populations of *Drosophila melanogaster*. 1.  
661 Spontaneous mutation rate of polygenes controlling viability. *Genetics* **50**, 1-19.
- 662 [25] Halligan, D.L. & Keightley, P.D. 2009 Spontaneous mutation accumulation studies in evolutionary  
663 genetics. *Annual Review of Ecology Evolution and Systematics* **40**, 151-172.  
664 (doi:10.1146/annurev.ecolsys.39.110707.173437).
- 665 [26] Keightley, P.D. & Caballero, A. 1997 Genomic mutation rates for lifetime reproductive output and  
666 lifespan in *Caenorhabditis elegans*. *Proceedings of the National Academy of Sciences of the United States*  
667 *of America* **94**, 3823-3827.
- 668 [27] Baer, C.F., Shaw, F., Steding, C., Baumgartner, M., Hawkins, A., Houppert, A., Mason, N., Reed, M.,  
669 Simonelic, K., Woodard, W., et al. 2005 Comparative evolutionary genetics of spontaneous mutations  
670 affecting fitness in rhabditid nematodes. *Proceedings of the National Academy of Sciences of the United*  
671 *States of America* **102**, 5785-5790.
- 672 [28] Vassilieva, L.L. & Lynch, M. 1999 The rate of spontaneous mutation for life-history traits in  
673 *Caenorhabditis elegans*. *Genetics* **151**, 119-129.
- 674 [29] Rajaei, M., Saxena, A.S., Johnson, L.M., Snyder, M.C., Crombie, T.A., Tanny, R.E., Andersen, E.C.,  
675 Joyner-Matos, J. & Baer, C.F. 2021 Mutability of mononucleotide repeats, not oxidative stress, explains  
676 the discrepancy between laboratory-accumulated mutations and the natural allele-frequency spectrum  
677 in *C. elegans*. *Genome Research*. (doi:10.1101/gr.275372.121).
- 678 [30] Johnson, L.M., Smith, O.J., Hahn, D.A. & Baer, C.F. 2020 Short-term heritable variation overwhelms  
679 200 generations of mutational variance for metabolic traits in *Caenorhabditis elegans*. *Evolution* **74**,  
680 2451-2464. (doi:<https://doi.org/10.1111/evo.14104>).
- 681 [31] Beltran, T., Shahrezaei, V., Katju, V. & Sarkies, P. 2020 Epimutations driven by small RNAs arise  
682 frequently but most have limited duration in *Caenorhabditis elegans*. *Nature Ecology & Evolution*.  
683 (doi:10.1038/s41559-020-01293-z).
- 684 [32] Yeh, S.-D., Saxena, A.S., Crombie, T.A., Feistel, D., Johnson, L.M., Lam, I., Lam, J., Saber, S. & Baer,  
685 C.F. 2018 The mutational decay of male-male and hermaphrodite-hermaphrodite competitive fitness in  
686 the androdioecious nematode *C. elegans*. *Heredity* **120**, 1-12. (doi:10.1038/s41437-017-0003-8).
- 687 [33] Etienne, V., Andersen, E.C., Ponciano, J.M., Blanton, D., Cadavid, A., Joyner-Matos, J., Matsuba, C.,  
688 Tabman, B. & Baer, C.F. 2015 The red death meets the abdominal bristle: Polygenic mutation for  
689 susceptibility to a bacterial pathogen in *Caenorhabditis elegans*. *Evolution* **69**, 508-519.  
690 (doi:10.1111/evo.12585).
- 691 [34] Hosono, R. 1978 Sterilization and growth inhibition of *Caenorhabditis elegans* by 5-  
692 fluorodeoxyuridine. *Exp Gerontol* **13**, 369-374. (doi:10.1016/0531-5565(78)90047-5).
- 693 [35] Lee, K.H. & Aschner, M. 2016 A Simple Light Stimulation of *Caenorhabditis elegans*. *Curr Protoc*  
694 *Toxicol* **67**, 11.21.11-11.21.15. (doi:10.1002/0471140856.tx1121s67).
- 695 [36] Allen, L.J.S. 2010 *An Introduction to Stochastic Processes with Applications to Biology*. 2nd ed,  
696 Chapman and Hall / CRC.
- 697 [37] Lynch, M. & Walsh, B. 1998 *Genetic Analysis of Quantitative Traits*. Sunderland, MA, Sinauer.
- 698 [38] Hansen, T.F. & Houle, D. 2008 Measuring and comparing evolvability and constraint in multivariate  
699 characters. *Journal of Evolutionary Biology* **21**, 1201-1219. (doi:10.1111/j.1420-9101.2008.01573.x).
- 700 [39] Falconer, D.S. 1989 *Quantitative Genetics*. Third ed. Essex, UK, Longman Scientific and Technical.
- 701 [40] Kenward, M.G. & Roger, J.H. 1997 Small sample inference for fixed effects from restricted maximum  
702 likelihood. *Biometrics* **53**, 983-997. (doi:10.2307/2533558).
- 703 [41] Hurvich, C.M. & Tsai, C.L. 1989 Regression and time-series model selection in small samples.  
704 *Biometrika* **76**, 297-307. (doi:10.2307/2336663).

- 705 [42] Schluter, D. 1996 Adaptive radiation along genetic lines of least resistance. *Evolution* **50**, 1766-1774.  
706 (doi:10.2307/2410734).
- 707 [43] Lande, R. 1979 Quantitative genetic analysis of multivariate evolution, applied to brain:body size  
708 allometry. *Evolution* **33**, 402-416. (doi:10.2307/2407630).
- 709 [44] Baer, C.F. & Lynch, M. 2003 Correlated evolution of life-history with size at maturity in *Daphnia*  
710 *pulicaria*: patterns within and between populations. *Genetics Research* **81**, 123-132.  
711 (doi:10.1017/s0016672303006098).
- 712 [45] Biere, A. & Antonovics, J. 1996 Sex-specific costs of resistance to the fungal pathogen *Ustilago*  
713 *violacea* (*Microbotryum violaceum*) in *Silene alba*. *Evolution* **50**, 1098-1110. (doi:10.2307/2410650).
- 714 [46] Tian, D., Traw, M.B., Chen, J.Q., Kreitman, M. & Bergelson, J. 2003 Fitness costs of R-gene-mediated  
715 resistance in *Arabidopsis thaliana*. *Nature* **423**, 74-77. (doi:10.1038/nature01588).
- 716 [47] Duncan, A.B., Fellous, S. & Kaltz, O. 2011 Reverse evolution: selection against costly resistance in  
717 disease-free microcosm populations of *Paramecium caudatum*. *Evolution* **65**, 3462-3474.  
718 (doi:10.1111/j.1558-5646.2011.01388.x).
- 719 [48] Kraaijeveld, A.R. & Godfray, H.C.J. 2008 Selection for resistance to a fungal pathogen in *Drosophila*  
720 *melanogaster*. *Heredity* **100**, 400-406. (doi:10.1038/sj.hdy.6801092).
- 721 [49] Katju, V., Packard, L.B. & Keightley, P.D. 2018 Fitness decline under osmotic stress in *Caenorhabditis*  
722 *elegans* populations subjected to spontaneous mutation accumulation at varying population sizes.  
723 *Evolution* **72**, 1000-1008. (doi:10.1111/evo.13463).
- 724 [50] Matsuba, C., Ostrow, D.G., Salomon, M.P., Tolani, A. & Baer, C.F. 2013 Temperature, stress and  
725 spontaneous mutation in *Caenorhabditis briggsae* and *Caenorhabditis elegans*. *Biology Letters* **9**.  
726 (doi:10.1098/rsbl.2012.0334).
- 727 [51] Yun, L. & Agrawal, A.F. 2014 Variation in the strength of inbreeding depression across  
728 environments: Effects of stress and density dependence. *Evolution* **68**, 3599-3606.  
729 (doi:10.1111/evo.12527).
- 730 [52] Agrawal, A.F. & Whitlock, M.C. 2010 Environmental duress and epistasis: how does stress affect the  
731 strength of selection on new mutations? *Trends in Ecology & Evolution* **25**, 450-458.  
732 (doi:10.1016/j.tree.2010.05.003).
- 733 [53] Lynch, M. 1985 Spontaneous mutations for life-history characters in an obligate parthenogen.  
734 *Evolution* **39**, 804-818. (doi:10.1111/j.1558-5646.1985.tb00422.x).
- 735 [54] Lynch, M. & Walsh, B. 1998 *Genetics and Analysis of Quantitative Traits*. Sunderland, MA., Sinauer;  
736 xvi, 980 p.
- 737 [55] Houle, D., Morikawa, B. & Lynch, M. 1996 Comparing mutational variabilities. *Genetics* **143**, 1467-  
738 1483.
- 739 [56] Davies, S.K., Leroi, A.M., Burt, A., Bundy, J. & Baer, C.F. 2016 The mutational structure of  
740 metabolism in *Caenorhabditis elegans*. *Evolution* **70**, 2239-2246. (doi:10.1111/evo.13020).
- 741 [57] Houle, D., Mezey, J. & Galpern, P. 2002 Interpretation of the results of common principal  
742 components analyses. *Evolution* **56**, 433-440.
- 743 [58] Houle, D. 1998 How should we explain variation in the genetic variance of traits? *Genetica* **103**, 241-  
744 253.
- 745 [59] Houle, D., Bolstad, G.H., van der Linde, K. & Hansen, T.F. 2017 Mutation predicts 40 million years of  
746 fly wing evolution. *Nature* **548**, 447-452. (doi:10.1038/nature23473).
- 747 [60] Farhadifar, R., Ponciano, J.M., Andersen, E.C., Needleman, D.J. & Baer, C.F. 2016 Mutation is a  
748 sufficient and robust predictor of genetic variation for mitotic spindle traits in *Caenorhabditis elegans*.  
749 *Genetics*. (doi:10.1534/genetics.115.185736).
- 750 [61] Lynch, M., Latta, L., Hicks, J. & Giorgianni, M. 1998 Mutation, selection, and the maintenance of life-  
751 history variation in a natural population. *Evolution* **52**, 727-733.

- 752 [62] Rechavi, O. & Lev, I. 2017 Principles of Transgenerational Small RNA Inheritance in *Caenorhabditis*  
753 *elegans*. *Current Biology* **27**, R720-R730. (doi:10.1016/j.cub.2017.05.043).
- 754 [63] Jablonka, E. & Raz, G. 2009 Transgenerational epigenetic inheritance: prevalence, mechanisms, and  
755 implications for the study of heredity and evolution. *Quarterly Review of Biology* **84**, 131-176.  
756 (doi:10.1086/598822).
- 757 [64] Klosin, A., Casas, E., Hidalgo-Carcedo, C., Vavouri, T. & Lehner, B. 2017 Transgenerational  
758 transmission of environmental information in *C. elegans*. *Science* **356**, 316-319.  
759 (doi:10.1126/science.aah6412).
- 760 [65] Baugh, L.R. & Day, T. 2020 Nongenetic inheritance and multigenerational plasticity in the nematode  
761 *C. elegans*. *eLife* **9**. (doi:10.7554/eLife.58498).
- 762 [66] Rechavi, O., Hourli-Ze'evi, L., Anava, S., Goh, W.S.S., Kerk, S.Y., Hannon, G.J. & Hobert, O. 2014  
763 Starvation-Induced Transgenerational Inheritance of Small RNAs in *C. elegans*. *Cell* **158**, 277-287.  
764 (doi:10.1016/j.cell.2014.06.020).
- 765 [67] Jobson, M.A., Jordan, J.M., Sandrof, M.A., Hibshman, J.D., Lennox, A.L. & Baugh, L.R. 2015  
766 Transgenerational effects of early life starvation on growth, reproduction, and stress resistance in  
767 *Caenorhabditis elegans*. *Genetics* **201**, 201+. (doi:10.1534/genetics.115.178699).
- 768 [68] Chow, Y.L. & Sato, F. 2019 Transgenerational lipid-reducing activity of benzylisoquinoline alkaloids  
769 in *Caenorhabditis elegans*. *Genes to Cells* **24**, 70-81. (doi:10.1111/gtc.12657).
- 770 [69] Kishimoto, S., Uno, M., Okabe, E., Nono, M. & Nishida, E. 2017 Environmental stresses induce  
771 transgenerationally inheritable survival advantages via germline-to-soma communication in  
772 *Caenorhabditis elegans*. *Nat. Commun.* **8**. (doi:10.1038/ncomms14031).
- 773 [70] Rechavi, O., Minevich, G. & Hobert, O. 2011 Transgenerational Inheritance of an acquired small  
774 RNA-based antiviral response in *C. elegans*. *Cell* **147**, 1248-1256. (doi:10.1016/j.cell.2011.10.042).
- 775 [71] Belicard, T., Jareosettasin, P. & Sarkies, P. 2018 The piRNA pathway responds to environmental  
776 signals to establish intergenerational adaptation to stress. *BMC Biol.* **16**. (doi:10.1186/s12915-018-0571-  
777 y).
- 778 [72] Gilbert, K.J., Zdraljevic, S., Cook, D.E., Cutter, A.D., Andersen, E.C. & Baer, C.F. 2021 The distribution  
779 of mutational effects on fitness in *Caenorhabditis elegans* inferred from standing genetic variation.  
780 *bioRxiv*, 2020.2010.2026.355446. (doi:10.1101/2020.10.26.355446).
- 781 [73] Moore, R.S., Kaletsky, R., Lesnik, C., Cota, V., Blackman, E., Parsons, L.R., Gitai, Z. & Murphy, C.T.  
782 2021 The role of the Cer1 transposon in horizontal transfer of transgenerational memory. *Cell* **3**, 00881-  
783 00883.
- 784 [74] Lee, D., Zdraljevic, S., Stevens, L., Wang, Y., Tanny, R.E., Crombie, T.A., Cook, D.E., Webster, A.K.,  
785 Chirakar, R., Baugh, L.R., et al. 2021 Balancing selection maintains hyper-divergent haplotypes in  
786 *Caenorhabditis elegans*. *Nature Ecology & Evolution*. (doi:10.1038/s41559-021-01435-x).
- 787 [75] Hawley, D.M. & Fleischer, R.C. 2012 Contrasting epidemic histories reveal pathogen-mediated  
788 balancing selection on Class II MHC diversity in a wild songbird. *PLoS One* **7**.  
789 (doi:10.1371/journal.pone.0030222).
- 790 [76] Horger, A.C., Ilyas, M., Stephan, W., Tellier, A., van der Hoorn, R.A.L. & Rose, L.E. 2012 Balancing  
791 selection at the Tomato RCR3 guard gene family maintains variation in strength of pathogen defense.  
792 *Plos Genetics* **8**. (doi:10.1371/journal.pgen.1002813).
- 793 [77] Fumagalli, M., Cagliani, R., Pozzoli, U., Riva, S., Comi, G.P., Menozzi, G., Bresolin, N. & Sironi, M.  
794 2009 Widespread balancing selection and pathogen-driven selection at blood group antigen genes.  
795 *Genome Research* **19**, 199-212. (doi:10.1101/gr.082768.108).
- 796 [78] Quéméré, E., Hessenauer, P., Galan, M., Fernandez, M., Merlet, J., Chaval, Y., Morellet, N.,  
797 Verheyden, H., Gilot-Fromont, E. & Charbonnel, N. 2021 Pathogen-mediated selection favours the  
798 maintenance of innate immunity gene polymorphism in a widespread wild ungulate. *Journal of*  
799 *Evolutionary Biology* **34**, 1156-1166. (doi:https://doi.org/10.1111/jeb.13876).

800

801
